RESEARCH ARTICLE

# Optimization of a Multi-Product Intra-Supply Chain System with Failure in Rework

Singa Wang Chiu<sup>1</sup>, Shin-Wei Chen<sup>2</sup>, Chih-Kai Chang<sup>2</sup>, Yuan-Shyi Peter Chiu<sup>2\*</sup>

**1** Dept. of Business Administration, Chaoyang University of Technology, Wufong District, Taichung, Taiwan,

**2** Dept. of Industrial Engineering & Management, Chaoyang University of Technology, Wufong District, Taichung, Taiwan

☉ These authors contributed equally to this work.

\* [ypchiu@cyut.edu.tw](mailto:ypchiu@cyut.edu.tw)

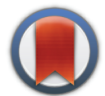

CrossMark  
click for updates

## OPEN ACCESS

**Citation:** Chiu SW, Chen S-W, Chang C-K, Chiu Y-SP (2016) Optimization of a Multi-Product Intra-Supply Chain System with Failure in Rework. PLoS ONE 11(12): e0167511. doi:10.1371/journal.pone.0167511

**Editor:** Yongtang Shi, Nankai University, CHINA

**Received:** May 22, 2016

**Accepted:** November 15, 2016

**Published:** December 5, 2016

**Copyright:** © 2016 Chiu et al. This is an open access article distributed under the terms of the [Creative Commons Attribution License](https://creativecommons.org/licenses/by/4.0/), which permits unrestricted use, distribution, and reproduction in any medium, provided the original author and source are credited.

**Data Availability Statement:** All relevant data are within the paper.

**Funding:** This work was supported by the Ministry of Science and Technology (MOST) of Taiwan and #MOST 102-2410-H-324-015-MY2. The funders had no role in study design, data collection and analysis, decision to publish, or preparation of the manuscript.

**Competing Interests:** The authors have declared that no competing interests exist.

## Abstract

Globalization has created tremendous opportunities, but also made business environment highly competitive and turbulent. To gain competitive advantage, management of present-day transnational firms always seeks options to trim down various transaction and coordination costs, especially in the area of controllable intra-supply chain system. This study investigates a multi-product intra-supply chain system with failure in rework. To achieve maximum machine utilization, multiple products are fabricated in succession on a single machine. During the process, production of some defective items is inevitable. Reworking of nonconforming items is used to reduce the quality cost in production and achieving the goal of lower overall production cost. Because reworks are sometimes unsuccessful, failures in rework are also considered in this study. Finished goods for each product are transported to the sales offices when the entire production lot is quality assured after rework. A multi-delivery policy is used, wherein fixed quantity  $n$  installments of the finished lot are transported at fixed intervals during delivery time. The objective is to jointly determine the common production cycle time and the number of deliveries needed to minimize the long-term expected production-inventory-delivery costs for the problem. With the help of a mathematical model along with optimization technique, the optimal production-shipment policy is obtained. We have used a numerical example to demonstrate applicability of the result of our research.

## Introduction

A multi-product intra-supply chain system with failure in rework is examined in this study. Maximizing machine utilization and minimizing total production and delivery costs are two important operating goals for manufacturing firms today [1–2]. In order to reach the goal of maximum machine utilization, the production planner frequently proposes manufacturing multiple products in succession using single piece of production equipment. Zipkin [3] examined a production system that yields multiple products in large, discrete batches and assumes both the demand and production process to be stochastic. His approach combined standard inventory and queuing sub-models with classical optimization problems to minimize the approximate operating cost of a given facility through the use of certain simple, plausible control policies. Rosenblatt and Rothblum [4] treated capacity as a decision variable when

studying multi-item inventory systems under a single-resource capacity constraint. They proposed two solution procedures for deriving an optimal policy within the class of policies that has a fixed cycle for all items with phasing of orders within the cycle. Through illustration of an example, they demonstrated that their solution procedures can be applied to various types of cost functions. Arreola-Risa [5] explored an integrated multi-item production-inventory system with stochastic demands and capacitated production. The objective was to determine the base stock levels needed to minimize the expected inventory costs per unit time. He derived analytical expressions that generate optimal base stock levels for deterministic or exponentially distributed unit manufacturing times. Khoury et al. [6] studied a multi-product lot-scheduling problem characterized by insufficient capacity. A two-product problem was examined using the common cycle approach. Then, they discussed the extended the problem to include any number of products. Caggiano et al. [7] presented a method for computing channel fill rates in a multi-item, multi-echelon service parts distribution system. A simulation technique was used to study the proposed multi-item, three-echelon production-distribution system. Their claimed that their estimation errors were very small over a wide range of base stock level vectors. Björk [8] developed a fuzzy, multi-item economic production quantity (EPQ) model with the aim of helping companies decide production batch sizes under uncertain cycle times. In his model, uncertainty was handled with triangular fuzzy numbers, and an analytical solution to the optimization problem was obtained. Other studies that addressed various aspects of multi-item production planning and optimization issues can be found in [9–14].

For most manufacturing firms today, product quality assurance is an important operational goal. During a given production run, the generation of random defective items is virtually inevitable. Reworking these nonconforming items can serve to increase product quality as well as reduce quality costs in production. Thus, reworking can help minimize overall production and inventory costs, for example, in the production of plastic goods in the plastic injection molding process or in printed circuit board assembly (PCBA) in the PCBA fabrication process. Rework has been adopted by some firms in the manufacturing sector because it increases product quality and decreases costs. Agnihotri and Kenett [15] studied a fabrication system in which all produced items are fully inspected and the identified nonconforming items are reworked. Their objective was to investigate the impact of imperfection on different system performance measures. Subsequently, they provided management guidelines to cope with short-term production control issues (e.g. finding and eliminating bottlenecks) and to achieve the long-term goal of reducing the defective rate. Teunter and Flapper [16] explored a single-stage fabrication system and categorized all fabricated items as perfect quality, re-workable nonconforming, or scrap items. It was assumed that upon production of  $N$  units, the regular fabrication mode switches to the reworking model and start to repair the nonconforming items. Accordingly, they derived the optimal value for  $N$  that maximizes the average profit. Sarker et al. [17] studied a multi-stage fabrication system with rework. Two separate reworking policies were examined. The first one assumes that the rework to be done within the same cycle without shortage, and the second policy assumes that the rework to be done after  $N$  cycles with potential shortages occurrence. They used numerical examples with sensitivity analyses to demonstrate and conclude their research results. Additional studies [18–23] addressed various aspects of imperfect quality production and rework processes.

Although a continuous inventory issuing policy is assumed in the conventional EPQ model [24], multiple or periodic product delivery policies are often used in real-world supply chain environments. Banerjee [25] studied a joint economic lot-size model for purchaser and vendor with a focus on minimizing the joint total relevant cost. He concluded that a joint optimal ordering policy, together with an appropriate price adjustment, could be economically beneficial for both parties. Thomas and Hackman [26] examined a supply chain environment in

which a distributor faces price-sensitive demand and has the option of delivery at regular intervals over a finite horizon in exchange for a per-unit cost reduction for units acquired via committed delivery. A simulation approximation is used to develop models for normally distributed demand in order to obtain solutions for the optimal order quantity and a resale price for the distributor. Archetti et al. [27] studied a distribution plan for delivering free newspapers from a production plant to subway, bus, and train stations. Their goals were to minimize the number of vehicle trips needed to distribute all newspapers and the time needed to consume all of the newspapers (i.e., the time needed for readers to receive all of the newspapers). A formulation, several heuristic approaches, and a hybrid method were proposed to solve such an integrated inventory-routing problem with constraints related to the production schedule. Real-world data were applied to their model to demonstrate performance of their approaches. Chiu et al. [28] derived an optimal solution of production cycle length for a multi-product finite production rate system with rework and multi-delivery policy, with the objective of minimizing *vendor's* total production-inventory costs. Chiu et al. [29] examined an intra-supply chain system wherein a *single product* fabricated by a single machine in production units with perfect rework, and after rework the finished lot is distributed to multiple sales offices under a multi-delivery policy. Other studies [30–49] also addressed different aspects of vendor-buyer integrated types of systems.

With the aim of lowering overall operating cost within an intra-supply chain system [29], this study extends the multi-item finite production rate problem [28] to a multi-product intra-supply chain problem with failures in rework, with the objective is to jointly determine the common production cycle time and number of deliveries needed to minimize the expected production-inventory-delivery costs for the problem. As little attention has been paid to this particular area, our study is intended to link the gap.

## Materials and Methods

### Problem Description

This paper studies a vendor-buyer integrated type of multi-product intra-supply chain system with failure in rework. To achieve the goal of maximizing machine utilization, it is common for the production units to create production plans that involve producing multiple products in sequence on a single machine. In this paper, it is assumed that during the production of each product  $i$  (where  $i = 1, 2, \dots, L$ ), a portion  $x_i$  of nonconforming items are randomly produced at a rate  $d_{1i}$ . All items produced are screened, and inspection cost is included in unit production cost  $C_i$ . In operations without permitted shortages, the constant production rate  $P_{1i}$  of product  $i$  must satisfy  $(P_{1i} - d_{1i} - \lambda_i) > 0$ , where  $\lambda_i$  is the annual demand rate for product  $i$ . Therefore,  $d_{1i}$  can be expressed as  $d_{1i} = x_i P_{1i}$ . All nonconforming items are reworked at the rate of  $P_{2i}$  at the end of the regular production process with additional unit rework cost  $C_{Ri}$ . It is further assumed that a *failure-in-rework* rate  $\varphi_i$  exists and those that fail during the rework process are scrapped at a disposal cost  $C_{Si}$  per item. So, the production rate of scrap items during rework  $d_{2i}$  can be expressed as  $\varphi_i P_{2i}$ . Finished products  $i$  are delivered to sales offices only if the entire lot produced is quality assured at the end of the rework process. A discontinuous inventory issuing policy is employed in which a fixed quantity of  $n$  installments of the finished lot is delivered at fixed time intervals during delivery time  $t_{3i}$  (see Fig 1). Sales offices' holding costs (see Fig 2) and product distribution costs are taken into account in the proposed system cost analysis.

To ensure that the production facility has sufficient capacity in regular production and rework processes to satisfy the demands for all  $L$  products, we must have (see section 3.1 for details):  $\sum_{i=1}^L \{[\lambda_i / (1 - \varphi_i x_i)] / P_{1i} + x_i [\lambda_i / (1 - \varphi_i x_i)] / P_{2i}\} < 1$ . The level of on-hand inventory of scrapped product  $i$  produced during the rework process is illustrated in Fig 3.

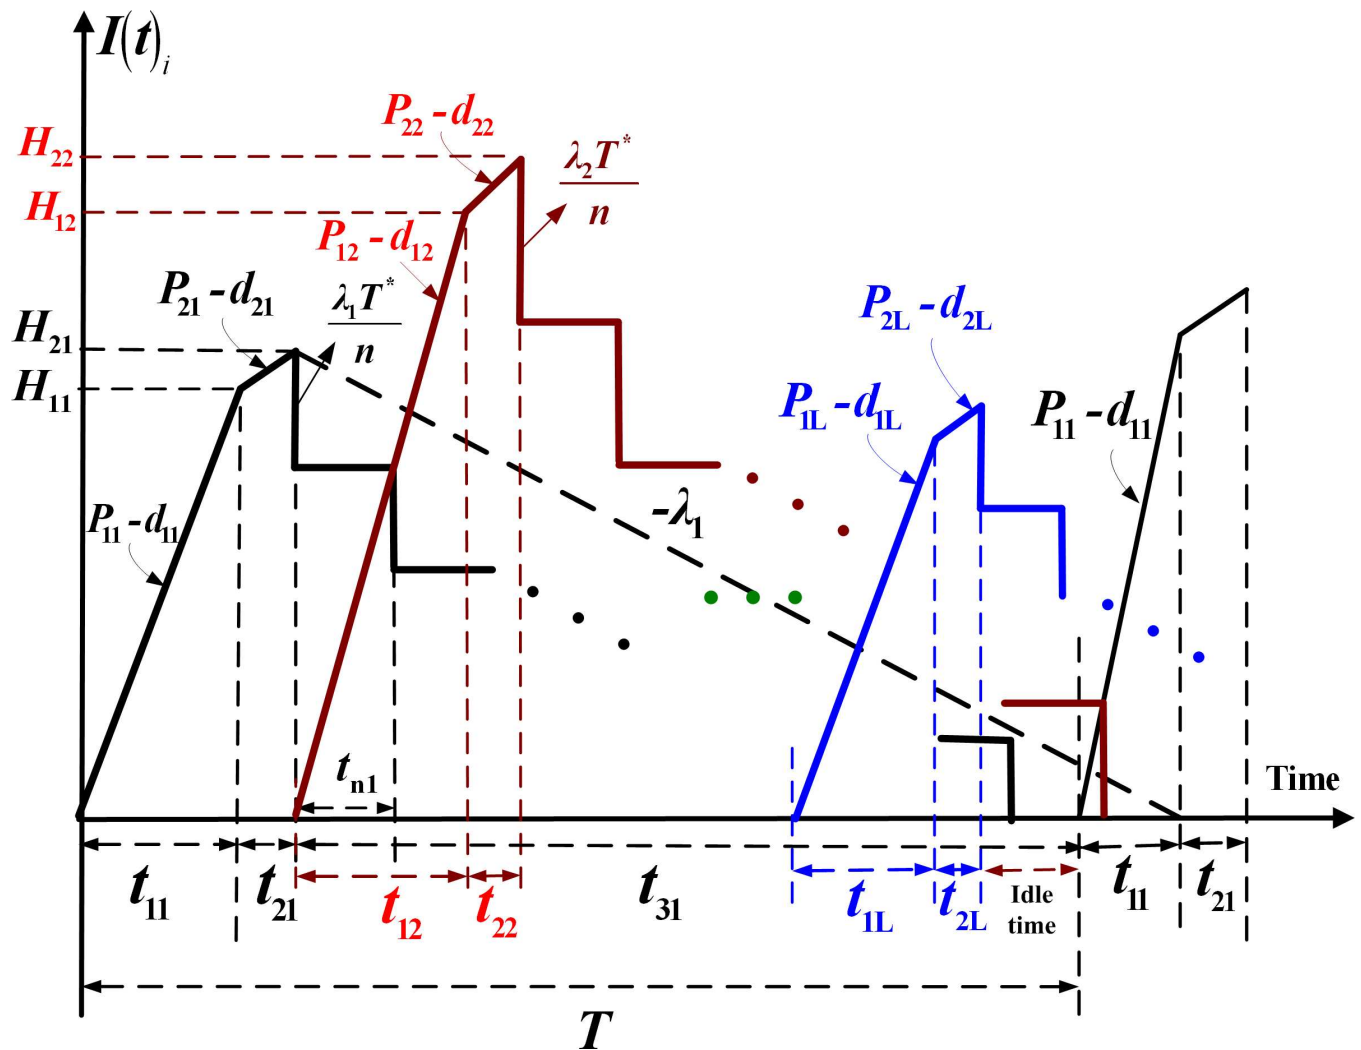

**Fig 1. On-hand inventory of perfect quality items in the proposed multi-product intra-supply chain system including stock levels in the production uptime, reworking time, and delivery time**

doi:10.1371/journal.pone.0167511.g001

The cost-related parameters for each product  $i$  include production setup cost  $K_i$ , unit stock holding cost  $h_i$ , holding cost  $h_{1i}$  for each item in rework, fixed distribution cost  $K_{1i}$  per shipment, unit shipping cost  $C_{Ti}$ , and sales offices' unit stock holding cost  $h_{2i}$ . Additional notation also includes in the Appendix A.

### Mathematical Modeling

By examining Figs 1–3, one can directly obtain the following formulae:

$$t_{1i} = \frac{Q_i}{P_{1i}} = \frac{H_{1i}}{P_{1i} - d_{1i}} \tag{1}$$

$$t_{2i} = \frac{x_i Q_i}{P_{2i}} \tag{2}$$

$$t_{3i} = nt_{ni} = T - (t_{1i} + t_{2i}) \tag{3}$$

$$T = t_{1i} + t_{2i} + t_{3i} \tag{4}$$

$$d_{1i}t_{1i} = x_i Q_i \tag{5}$$

$$H_{1i} = (P_{1i} - d_{1i})t_{1i} \tag{6}$$

$$H_{2i} = H_{1i} + (P_{2i} - d_{2i})t_{2i} \tag{7}$$

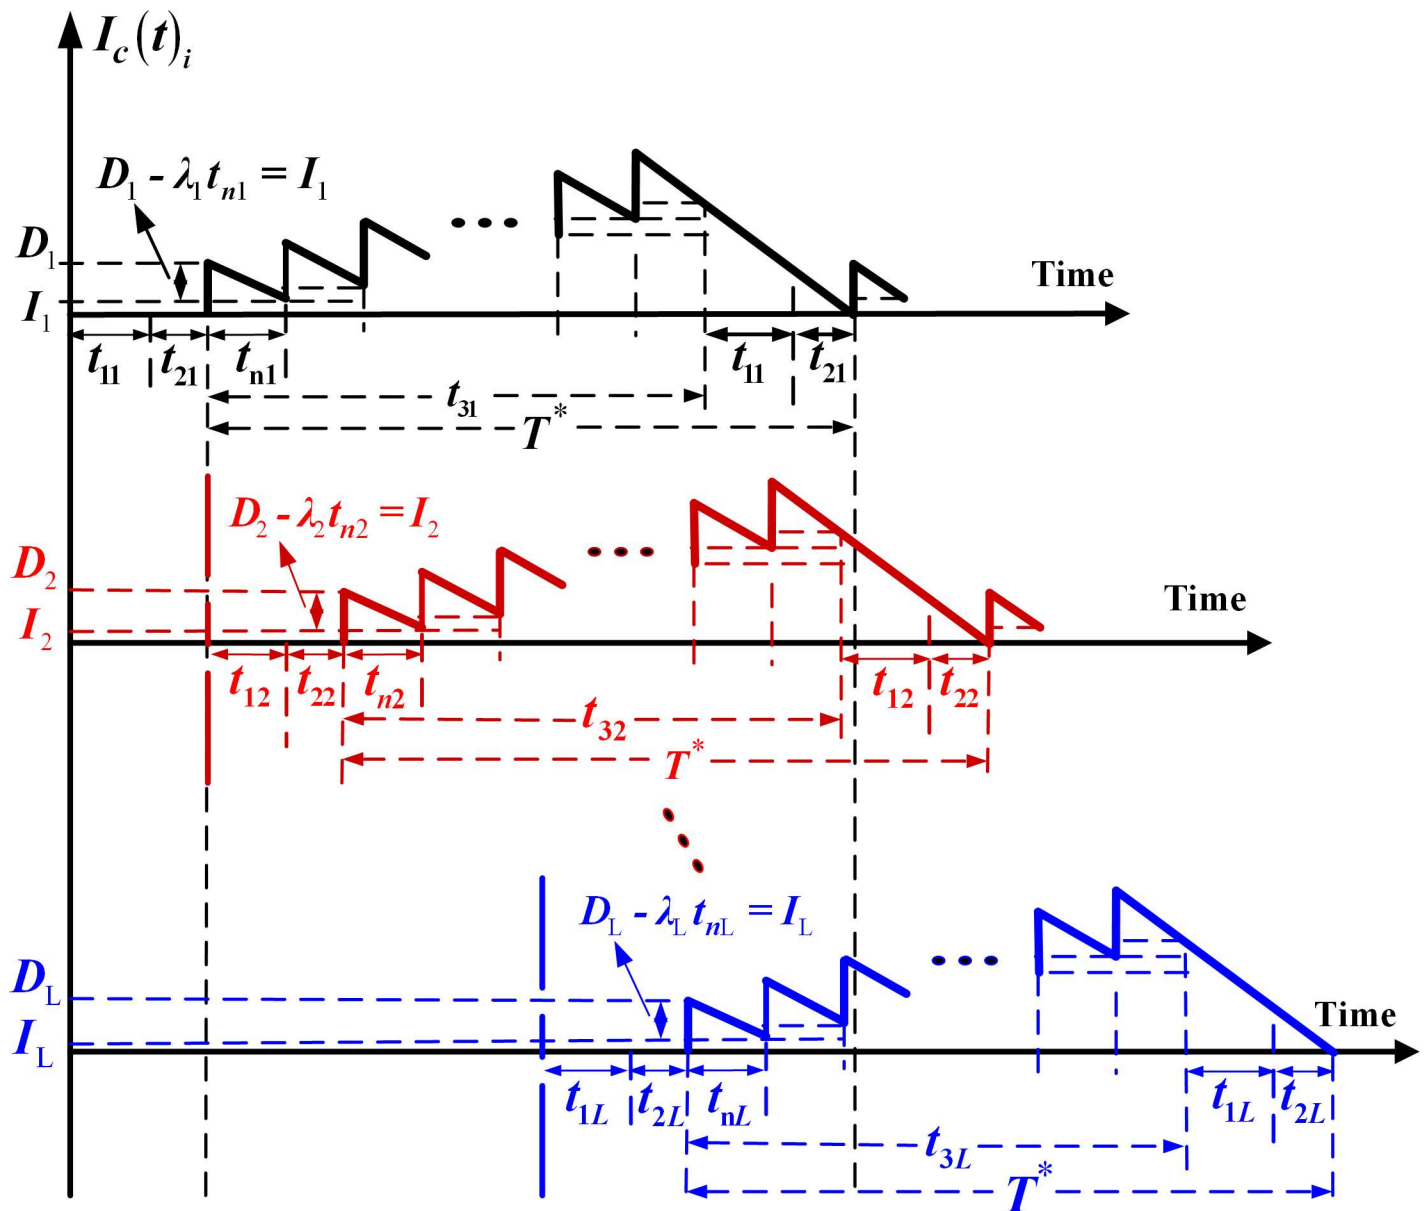

Fig 2. On-hand inventory of product  $i$  at the sales offices in the proposed multi-product intra-supply chain system including the pile-up stock levels in the end of each delivery

doi:10.1371/journal.pone.0167511.g002

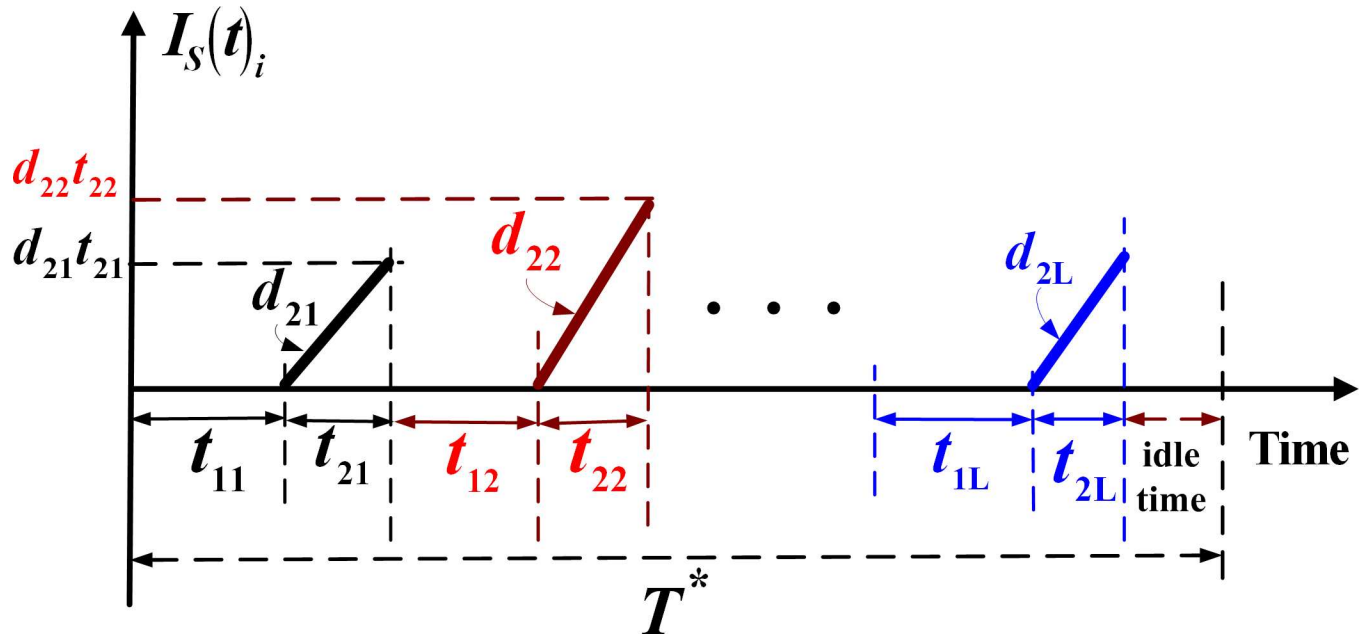

**Fig 3. On-hand inventory of scrapped product  $i$  produced during the rework process in the proposed multi-product intra-supply chain system with failure in rework**

doi:10.1371/journal.pone.0167511.g003

It is noted that in Eq (1),  $Q_i$  denotes the production batch size per cycle for product  $i$ ,  $P_{1i}$  represents the constant production rate for product  $i$ , and hence  $t_{1i}$  is the production uptime needed to produce the batch size  $Q_i$  of product  $i$  in a cycle. In Eq (2),  $x_i Q_i$  means the total number of defective items of product  $i$  produced in a production cycle,  $P_{2i}$  represents reworking rate of product  $i$ , and hence  $t_{2i}$  is the reworking time needed to repair these defective items of product  $i$  in a cycle. Eq (3) indicates that during the delivery time  $t_{3i}$ , all perfect quality items of product  $i$  start to be distributed to sales office in  $n$  fixed-quantity installments of the batch size, at fixed intervals  $t_{nr}$  of delivery time. Eq (5) shows that the relationship between the production rate  $d_{1i}$  of defective items of product  $i$  in uptime and the total number of defective items produced for product  $i$ . Eq (6) represents the on-hand inventory level of product  $i$  when regular production ends and how it can be computed. Eq (7) indicates the maximum on-hand inventory level of product  $i$  when reworking process finishes and how it can be calculated.

The holding cost for finished product  $i$  during  $t_3$ , where  $n$  fixed-quantity installments of the finished batch are distributed at a fixed interval of time [32] is

$$h_i \left( \frac{n-1}{2n} \right) H_{2i} t_{3i} \tag{8}$$

Total  $n$  shipment delivery cost for product  $i$  in a cycle is

$$nK_{li} + C_{Ti} Q_i (1 - \phi_i x_i) \tag{9}$$

From Fig 2, because  $n$  installments (fixed quantity  $D$ ) of the finished lot are delivered to a sales office at a fixed interval of time  $t_{nr}$ , one has the following:

$$D_i = \frac{H_{2i}}{n} \tag{10}$$

$$t_{ni} = \frac{t_{3i}}{n} \tag{11}$$

$$I_i = D_i - \lambda_i t_{ni} \tag{12}$$

The holding cost for finished product  $i$  stored at the sales offices, is [12]

$$h_{2i} \left[ n \frac{(D_i - I_i)}{2} t_{ni} + \frac{nI_i}{2} (t_{1i} + t_{2i}) + \frac{n(n + 1)}{2} I_i t_{ni} \right] \tag{13}$$

Eq (8) shows the total holding cost for finished product  $i$  during  $t_3$  [32]. Eq (9) gives the total delivery cost per cycle which includes the fixed and the variable transportation costs for all products. Eq (10) shows the fixed quantity per shipment of product  $i$  and how it can be computed and Eq (11) gives how to obtain the fixed interval of time  $t_{ni}$  in delivery time  $t_{3i}$  for product  $i$ . Eq (12) represents the number of items of product  $i$  left (after satisfying the demand) in the end of each delivery at the sale offices. Eq (13) shows how to calculate the stock holding costs at the sales offices [12].

Total production-inventory-delivery cost per cycle  $TC(Q_i, n)$  for  $i = 1, 2, \dots, L$ , consists of the production setup cost, variable production cost, variable reworking and disposal costs, fixed and variable delivery costs, production units' holding cost of perfect quality items during  $t_{1i}$ ,  $t_{2i}$ , and  $t_{3i}$ , holding cost of nonconforming items in  $t_{1i}$ , holding cost of reworked items at  $t_{2i}$ , and sales offices' holding cost of product  $i$ . Therefore, total  $TC(Q_i, n)$  for  $L$  products is

$$\sum_{i=1}^L TC(Q_i, n) = \sum_{i=1}^L \left\{ \begin{aligned} &K_i + C_i Q_i + C_{Ri}(x_i Q_i) + C_{Si} \varphi_i(x_i Q_i) + nK_{1i} + C_{Ti}[Q_i(1 - \varphi_i x_i)] \\ &+ h_i \left[ \frac{H_{1i} + d_{1i} t_{1i}}{2} (t_{1i}) + \frac{H_{1i} + H_{2i}}{2} (t_{2i}) + \frac{n - 1}{2n} (H_{2i} t_{3i}) \right] \\ &+ h_{1i} \frac{d_{1i} t_{1i}}{2} (t_{2i}) + h_{2i} \left[ n \frac{(D_i - I_i)}{2} t_{ni} + \frac{nI_i}{2} (t_{1i} + t_{2i}) + \frac{n(n + 1)}{2} I_i t_{ni} \right] \end{aligned} \right\} \tag{14}$$

By taking the randomness of defective rate  $x$  into account, our cost analysis uses the expected values of  $x$ . Substituting all variables from Eqs (1) to (13) in Eq (14) and applying the renewal reward theorem and with further derivations,  $E[TCU(Q_i, n)]$  can be obtained as follows:

$$E[TCU(Q_i, n)] = \sum_{i=1}^L \frac{1}{(1 - \varphi_i E[x_i])} \left\{ \begin{aligned} &\left[ C_i \lambda_i + \frac{K_i \lambda_i}{Q_i} + C_{Ri} \lambda_i E[x_i] + C_{Si} \varphi_i E[x_i] \lambda_i + C_{Ti} \lambda_i + \frac{nK_{1i} \lambda_i}{Q_i} \right] \\ &+ \frac{h_i Q_i \lambda_i}{2} \left[ \left( \frac{1}{\lambda_i} - \frac{1}{\lambda_i n} + \frac{1}{P_{1i} n} \right) + E[x_i] \left( \frac{1}{P_{2i}} + \frac{1}{P_{2i} n} \right) - E[x_i]^2 \left( \frac{1}{P_{2i}} + \frac{\varphi_i}{P_{2i} n} \right) \right] \\ &\left[ + \left( 1 - \frac{1}{n} \right) \left[ E[x_i] \left( \frac{\varphi_i}{P_{1i}} - \frac{2\varphi_i}{\lambda_i} \right) + E[x_i]^2 \left( \frac{\varphi_i^2}{\lambda_i} \right) \right] \right] \\ &+ \frac{h_{1i} Q_i \lambda_i E[x_i]^2}{2P_{2i}} + \frac{h_{2i} Q_i \lambda_i (1 - \varphi_i E[x_i])}{2} \left[ \frac{(1 - \varphi_i E[x_i])}{\lambda_i n} + \left( 1 - \frac{1}{n} \right) \left[ \frac{1}{P_{1i}} + \frac{E[x_i]}{P_{2i}} \right] \right] \end{aligned} \right\} \tag{15}$$

As  $Q_i = \frac{T\lambda_i}{1-\varphi_i E[x_i]}$ , and let  $E_{0i} = \frac{1}{1-\varphi_i E[x_i]}$  and  $E_{1i} = \frac{E[x_i]}{1-\varphi_i E[x_i]}$ , from Eq (15) one obtains the total expected system cost per unit time for producing  $L$  products,  $E[TCU(T, n)]$  as

$$E[TCU(T, n)] = \sum_{i=1}^L \left\{ \begin{aligned} & \left[ C_i \lambda_i E_{0i} + \frac{K_i}{T} + C_{Ri} \lambda_i E_{1i} + C_{Si} \varphi_i \lambda_i E_{1i} + C_{Ti} \lambda_i + \frac{nK_{1i}}{T} \right] \\ & + \frac{h_i \lambda_i^2}{2} T \left[ \frac{1}{\lambda_i} + \frac{\varphi_i E_{0i} E_{1i}}{P_{1i}} + \frac{E_{0i} E_{1i} - E_{1i}^2}{P_{2i}} \right] + \frac{h_{1i} \lambda_i^2 E_{1i}^2}{2P_{2i}} T \\ & + \frac{h_{2i} \lambda_i^2}{2} T \left( \frac{E_{0i}}{P_{1i}} + \frac{E_{1i}}{P_{2i}} \right) + \frac{\lambda_i^2}{2n} T \left[ \frac{1}{\lambda_i} - \frac{E_{0i}}{P_{1i}} - \frac{E_{1i}}{P_{2i}} \right] (h_{2i} - h_i) \end{aligned} \right\} \quad (16)$$

## Results and Discussion

### Joint Determination of Cycle Time and Shipment Policy

To determine the optimal rotation cycle time  $T^*$  and number of shipments  $n^*$ , one first proves that the expected system cost  $E[TCU(T, n)]$  is convex. Applying the Hessian matrix equations [50] and ensuring that the following condition holds:

$$\begin{bmatrix} T & n \end{bmatrix} \cdot \begin{pmatrix} \frac{\partial^2 E[TCU(T, n)]}{\partial T^2} & \frac{\partial^2 E[TCU(T, n)]}{\partial T \partial n} \\ \frac{\partial^2 E[TCU(T, n)]}{\partial T \partial n} & \frac{\partial^2 E[TCU(T, n)]}{\partial n^2} \end{pmatrix} \cdot \begin{bmatrix} T \\ n \end{bmatrix} > 0 \quad (17)$$

From Eq (16) one has:

$$\frac{\partial E[TCU(T, n)]}{\partial T} = \sum_{i=1}^L \left\{ \begin{aligned} & -\frac{K_i}{T^2} - \frac{nK_{1i}}{T^2} + \frac{h_i \lambda_i^2}{2} \left[ \frac{1}{\lambda_i} + \frac{\varphi_i E_{0i} E_{1i}}{P_{1i}} + \frac{E_{0i} E_{1i} - E_{1i}^2}{P_{2i}} \right] + \frac{h_{1i} \lambda_i^2 E_{1i}^2}{2P_{2i}} \\ & + \frac{h_{2i} \lambda_i^2}{2} \left( \frac{E_{0i}}{P_{1i}} + \frac{E_{1i}}{P_{2i}} \right) + \frac{\lambda_i^2}{2n} \left[ \frac{1}{\lambda_i} - \frac{E_{0i}}{P_{1i}} - \frac{E_{1i}}{P_{2i}} \right] (h_{2i} - h_i) \end{aligned} \right\} \quad (18)$$

$$\frac{\partial^2 E[TCU(T, n)]}{\partial T^2} = \sum_{i=1}^L \left[ \frac{2(K_i + nK_{1i})}{T^3} \right] \quad (19)$$

$$\frac{\partial E[TCU(T, n)]}{\partial n} = \sum_{i=1}^L \left[ \frac{K_{1i}}{T} + \frac{\lambda_i^2}{2n^2} T \left( \frac{1}{\lambda_i} - \frac{E_{0i}}{P_{1i}} - \frac{E_{1i}}{P_{2i}} \right) (h_i - h_{2i}) \right] \quad (20)$$

$$\frac{\partial^2 E[TCU(T, n)]}{\partial n^2} = \sum_{i=1}^L \left[ -\frac{\lambda_i^2 T}{n^3} \left( \frac{1}{\lambda_i} - \frac{E_{0i}}{P_{1i}} - \frac{E_{1i}}{P_{2i}} \right) (h_i - h_{2i}) \right] \quad (21)$$

$$\frac{\partial E[TCU(T, n)]}{\partial T \partial n} = \sum_{i=1}^L \left[ -\frac{K_{1i}}{T^2} + \frac{\lambda_i^2}{2n^2} \left( \frac{1}{\lambda_i} - \frac{E_{0i}}{P_{1i}} - \frac{E_{1i}}{P_{2i}} \right) (h_i - h_{2i}) \right] \quad (22)$$



Substituting Eqs (19), (21) and (22) in Eq (17) and with further derivation gives

$$[T \ n] \cdot \begin{pmatrix} \frac{\partial^2 E[TCU(T, n)]}{\partial T^2} & \frac{\partial^2 E[TCU(T, n)]}{\partial T \partial n} \\ \frac{\partial^2 E[TCU(T, n)]}{\partial T \partial n} & \frac{\partial^2 E[TCU(T, n)]}{\partial n^2} \end{pmatrix} \cdot \begin{bmatrix} T \\ n \end{bmatrix} = \sum_{i=1}^L \frac{2K_i}{T} > 0 \tag{23}$$

Eq (23) yields positive results, because  $K_i$  and  $T$  are both positive. It follows that  $E[TCU(T, n)]$  is a strictly convex function for all  $T$  and  $n$  values other than zero. Therefore, there exists a minimum for  $E[TCU(T, n)]$ .

Then, to jointly determine rotation cycle time  $T^*$  and number of shipments  $n^*$ , one differentiates  $E[TCU(T, n)]$  with respect to  $T$  and  $n$ , and solve the linear systems of Eqs (18) and (20) by setting these partial derivatives equal to zero. With further derivations, one obtains:

$$T^* = \sqrt{\frac{2 \sum_{i=1}^L (K_i + nK_{1i})}{\sum_{i=1}^L \left\{ h_i \lambda_i^2 \left[ \frac{1}{\lambda_i} + \frac{\varphi_i E_{0i} E_{1i}}{P_{1i}} + \frac{E_{0i} E_{1i} - E_{1i}^2}{P_{2i}} \right] + \frac{h_{1i} \lambda_i^2 E_{1i}^2}{P_{2i}} \right.}} \tag{24}$$

$$\left. + h_{2i} \lambda_i^2 \left( \frac{E_{0i}}{P_{1i}} + \frac{E_{1i}}{P_{2i}} \right) + \frac{\lambda_i^2}{n} \left[ \frac{1}{\lambda_i} - \frac{E_{0i}}{P_{1i}} - \frac{E_{1i}}{P_{2i}} \right] (h_{2i} - h_i) \right\}}$$

and

$$n^* = \sqrt{\frac{\sum_{i=1}^L K_i \cdot \sum_{i=1}^L \left[ \lambda_i^2 (h_{2i} - h_i) \left( \frac{1}{\lambda_i} - \frac{E_{0i}}{P_{1i}} - \frac{E_{1i}}{P_{2i}} \right) \right]}{\left( \sum_{i=1}^L K_{1i} \right) \cdot \sum_{i=1}^L \left[ h_i \lambda_i^2 \left( \frac{1}{\lambda_i} + \frac{E_{0i} E_{1i} - E_{1i}^2}{P_{2i}} + \frac{\varphi_i E_{0i} E_{1i}}{P_{1i}} \right) + \frac{h_{1i} \lambda_i^2 E_{1i}^2}{P_{2i}} + h_{2i} \lambda_i^2 \left( \frac{E_{0i}}{P_{1i}} + \frac{E_{1i}}{P_{2i}} \right) \right]}} \tag{25}$$

### Prerequisite Condition

One prerequisite condition must be satisfied (i.e., Eq (26)) to ensure that the machine in the proposed multi-product manufacturing system has sufficient capacity to manufacture and rework  $L$  different products under the rotation cycle time policy.

$$\sum_{i=1}^L \left[ \left( \frac{\lambda_i E_{0i}}{P_{1i}} \right) + \left( \frac{\lambda_i E_{1i}}{P_{2i}} \right) \right] < 1 \tag{26}$$

The setup time for each product will be another factor to carefully consider. In general, production setup time is relatively short compared to the total production and rework times. However, if the setup time becomes a factor, there must be enough time in each cycle to account for the sum of the production, rework, and setup times to produce  $L$  products [2]. Let  $S_i$  denote the setup time for product  $i$ , then the following condition must hold:

$$\sum_{i=1}^L \left[ S_i + \left( \frac{Q_i}{P_{1i}} \right) + \left( \frac{Q_i E[x_i]}{P_{2i}} \right) \right] < T \tag{27}$$

As  $Q_i = T\lambda_i E_{0i}$ , Eq (27) can be rearranged as

$$T > \frac{\sum_{i=1}^L S_i}{1 - \sum_{i=1}^L \left[ \lambda_i \left( \frac{E_{0i}}{P_{1i}} + \frac{E_{1i}}{P_{2i}} \right) \right]} = T_{\min} \tag{28}$$

Therefore, to include setup times in the proposed model, one should choose the optimal rotation cycle time from  $\max(T^*, T_{\min})$  [2].

### Numerical Example

Suppose in a multi-product intra-supply chain system, there are five different products to be made on a single machine under a rotation cycle time policy. Annual demands  $\lambda_i$  for these products are 3000, 3200, 3400, 3600, and 3800, respectively. They can be manufactured at annual production rates  $P_{1i}$  58000, 59000, 60000, 61000, and 62000, respectively. All items produced are screened and the inspection cost is included in unit production cost. During production, there are random defective rates associated with these products and they follow a uniform distribution over intervals of [0, 0.05], [0, 0.10], [0, 0.15], [0, 0.20], and [0, 0.25]. All defective items are reworked at an annual rate  $P_{2i}$  at the end of production in each cycle, where  $P_{2i}$  are 46400, 47200, 48000, 48800, and 49600, respectively. Additional unit cost for rework is \$50, \$55, \$60, \$65, and \$70, respectively. During the rework process, there is a failure in rework rate of ( $\varphi_i$ ) 10%, 15%, 20%, 25%, 30% associated with each product. Units that fail during the rework process will be scrapped at a unit disposal cost of ( $C_{Si}$ ) \$20, \$25, \$30, \$35, and \$40, respectively. Additional values for variables used in this example are listed as follows:

$C_i$  = unit manufacturing costs are \$80, \$90, \$100, \$110, and \$120 respectively.

$h_i$  = unit holding costs are \$10, \$15, \$20, \$25, and \$30 respectively.

$K_i$  = production setup costs are \$17000, \$17500, \$18000, \$18500, and \$19000, respectively.

$h_{1i}$  = rework process unit holding costs are \$30, \$35, \$40, \$45, and \$50, respectively.

$K_{1i}$  = the fixed delivery costs per shipment are \$1800, \$1900, \$2000, \$2100, and \$2200.

$h_{2i}$  = unit holding costs at the sales offices are \$70, \$75, \$80, \$85, and \$90 respectively.

$C_{Ti}$  = unit transportation costs are \$0.1, \$0.2, \$0.3, \$0.4, and \$0.5 respectively.

Applying Eq (25), we obtain  $n^* = 4.4122$ . In order to locate an integer value of  $n^*$  (as discussed in Section 3,  $n^*$  must be an integer), let  $n^+ = 5$  and  $n^- = 4$ , and plug them into Eq (24) one obtains ( $T = 0.6654, n^+ = 5$ ) and ( $T = 0.6183, n^- = 4$ ). Applying Eq (16) with these two sets of policies one finds  $E[TCU(0.6654, 5)] = \$2,280,154$  and  $E[TCU(0.6183, 4)] = \$2,279,874$ . To minimize the system cost, one selects ( $T^* = 0.6183, n^* = 4$ ) as the optimal production-shipment policy for the proposed model and the long-run expected system cost is  $E[TCU(T^*, n^*)] = \$2,279,874$ .

Fig 4 depicts variations of the mean failure-in-rework rate and mean defective rate and their effects on the expected system cost  $E[TCU(T^*, n^*)]$  of the proposed multi-product inventory system. It is noted that as the mean defective rate increases,  $E[TCU(T^*, n^*)]$  increases significantly, and as mean failure-in-rework rate increases,  $E[TCU(T^*, n^*)]$  increases slightly.

The effect of the rework rate (in terms of the ratio of rework and regular production rates, i.e.,  $P_{2i}/P_{1i}$ ) on the expected system cost  $E[TCU(T^*, n^*)]$  are illustrated in Fig 5. It is noted that there is a turning point at ratio  $P_{2i}/P_{1i} = 0.5$  (i.e., when the time required to rework a nonconforming item is at least twice as long as the regular time needed to produce an item); as  $P_{2i}/P_{1i}$

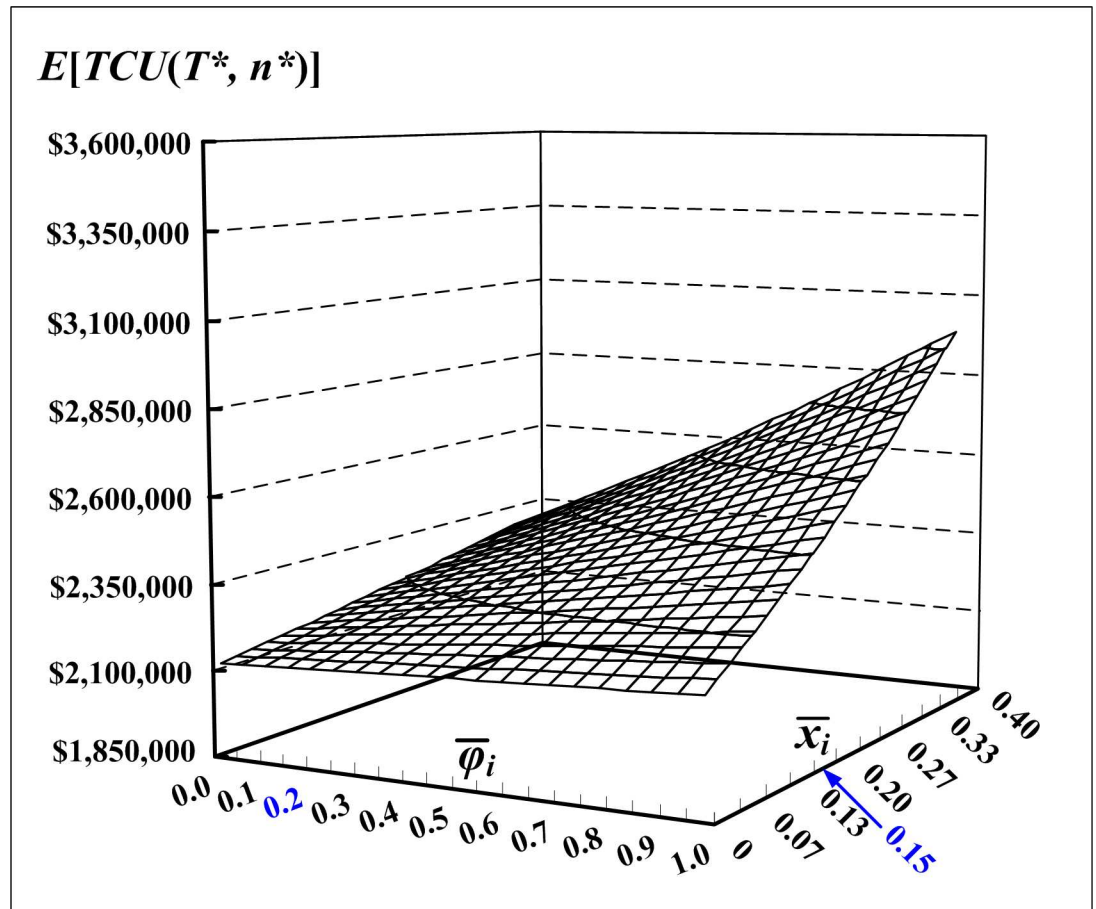

**Fig 4. Variations of the mean failure-in-rework rate and mean defective rate and their effects on  $E[TCU(T^*, n^*)]$  of the proposed multi-product intra-supply chain system, which indicates how quality cost pushing the expected system cost higher**

doi:10.1371/journal.pone.0167511.g004

decreases below 0.5, the expected system cost  $E[TCU(T^*, n^*)]$  begins to increase significantly; and also from the turning point, as  $P_{2i}/P_{1i}$  increases,  $E[TCU(T^*, n^*)]$  decreases slightly.

Fig 6 illustrates the variations of mean failure-in-rework rates and their effects on the optimal production-shipment policy and on the expected cost  $E[TCU(T^*, n^*)]$ . It is noted that as mean failure-in-rework rate increases, the expected system cost  $E[TCU(T^*, n^*)]$  increases significantly, but the optimal rotation cycle time  $T^*$  decreases slightly and  $n^*$  is unchanged.

Fig 7 depicts the variations of the rotation cycle time  $T$  and number of deliveries  $n$  and their effects on the expected cost  $E[TCU(T, n)]$ . This example reconfirms the convexity of the expected cost  $E[TCU(T, n)]$ .

Further analysis on the different components of the expected system cost  $E[TCU(T^*, n^*)]$  is displayed in Fig 8. It shows not only the dollar values of each cost components, but also their separate contributed percentages to the expected system cost. This can provide production managers with more insights of system cost parameters to assist them in cost control decision makings

### Conclusions

Optimization of a multi-product intra-supply chain system can benefit both production units and sales offices of an intra-supply chain’s parties, and help a firm achieve the goal of reducing

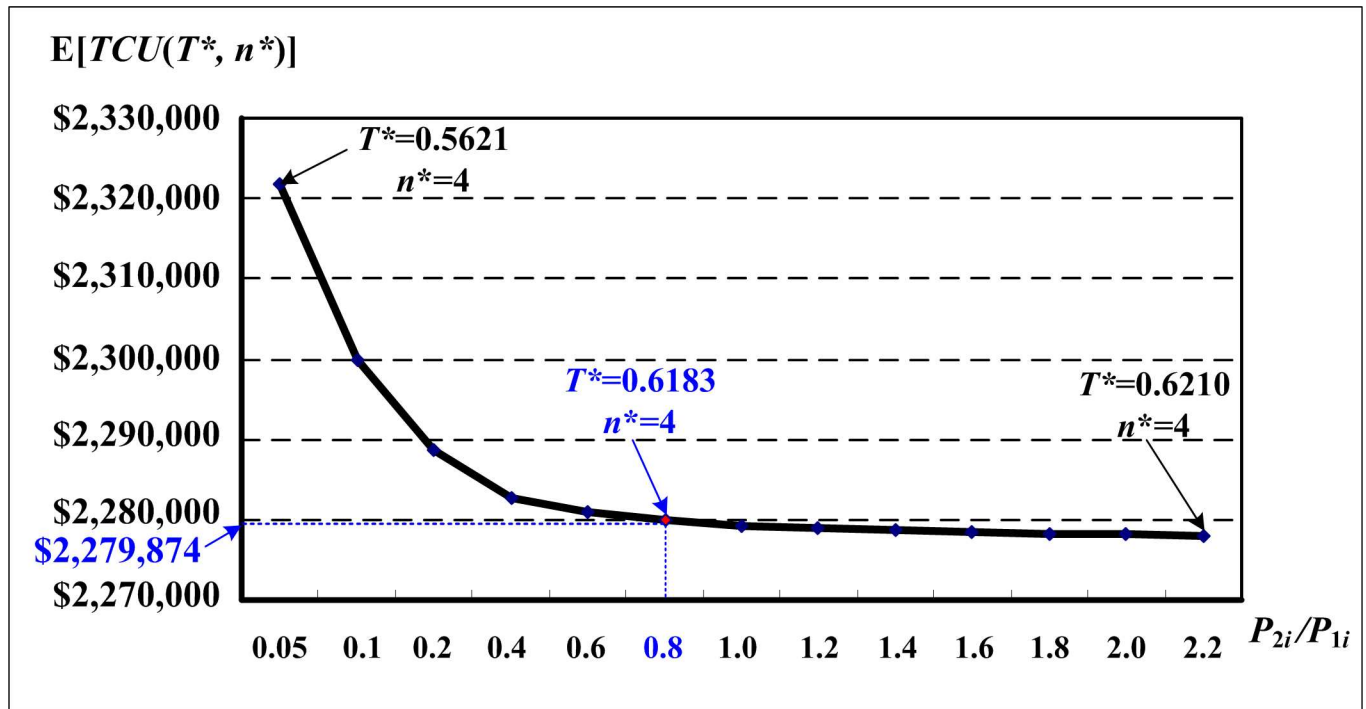

Fig 5. Variations of the ratio of rework and regular production rates ( $P_{2i}/P_{1i}$ ) and their effects on the expected system cost  $E[TCU(T^*, n^*)]$ , which shows that as  $P_{2i}/P_{1i}$  decreases below a turning point 0.5, the expected system cost begins to increase significantly

doi:10.1371/journal.pone.0167511.g005

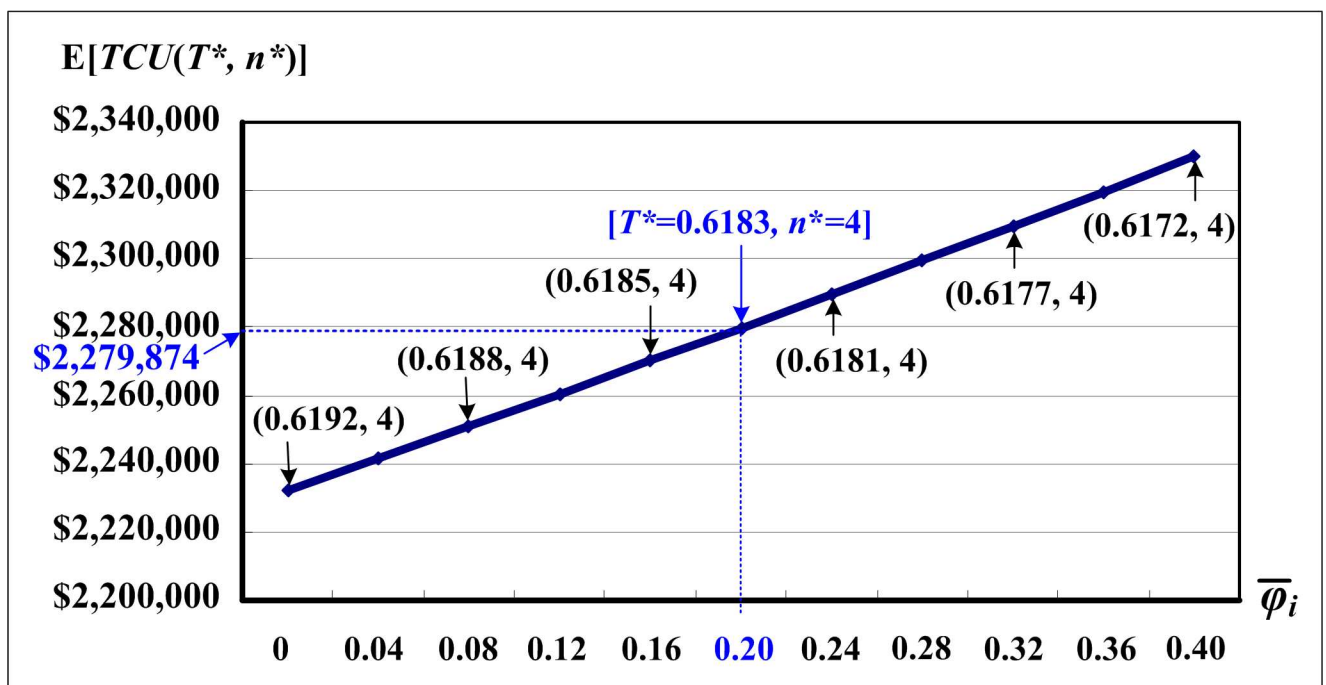

Fig 6. Variations of the mean failure-in-rework rates and their effects on optimal production-shipment policy and on the expected cost  $E[TCU(T^*, n^*)]$ , which reveals that the proposed model is capable of deriving optimal solutions to given general real situations

doi:10.1371/journal.pone.0167511.g006

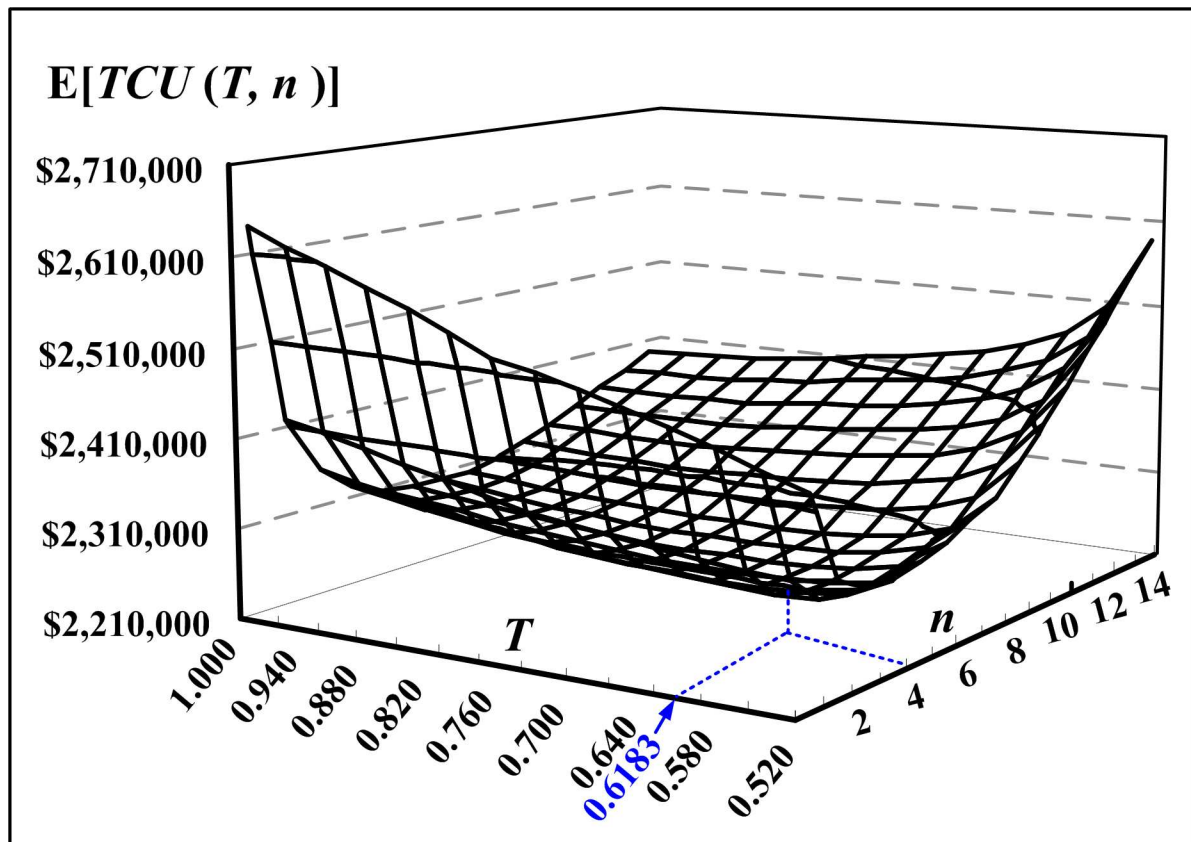

**Fig 7. Variations of the common production cycle time  $T$  and number of deliveries  $n$  and their effects on  $E[TCU(T, n)]$ , which illustrates the convexity of the expected system cost function**

doi:10.1371/journal.pone.0167511.g007

operating cost. No wonder that it has recently drawn attention from management of the present-day transnational firms. This study developed an exact mathematical model to the multi-product intra-supply chain problem with failures in rework, with the objective is to jointly determine the common production cycle time and number of deliveries needed to minimize the expected production-inventory-delivery costs for the problem. Mathematical modeling and optimization techniques are used to help us derive the optimal decisions to the problem. The research results enable managers to achieve the operational goals of maximizing machine utilization, and reducing both quality and delivery costs of their intra-supply chain system. Through a numerical example, we demonstrate the applicability of research results and their practical improvements (see Figs 4–8) to the realistic intra-supply chain system. For future study, one may consider the effect of the variable production rates on the optimal common cycle length of the problem.

### Appendix A

Additional notations used in the proposed multi-product intra-supply chain system are as follows:

$Q_i$  = production batch size per cycle for product  $i$ ,

$t_{1i}$  = uptime for product  $i$  in the proposed multi-product intra-supply chain system,

$t_{2i}$  = rework time for product  $i$  in the proposed multi-product intra-supply chain system,

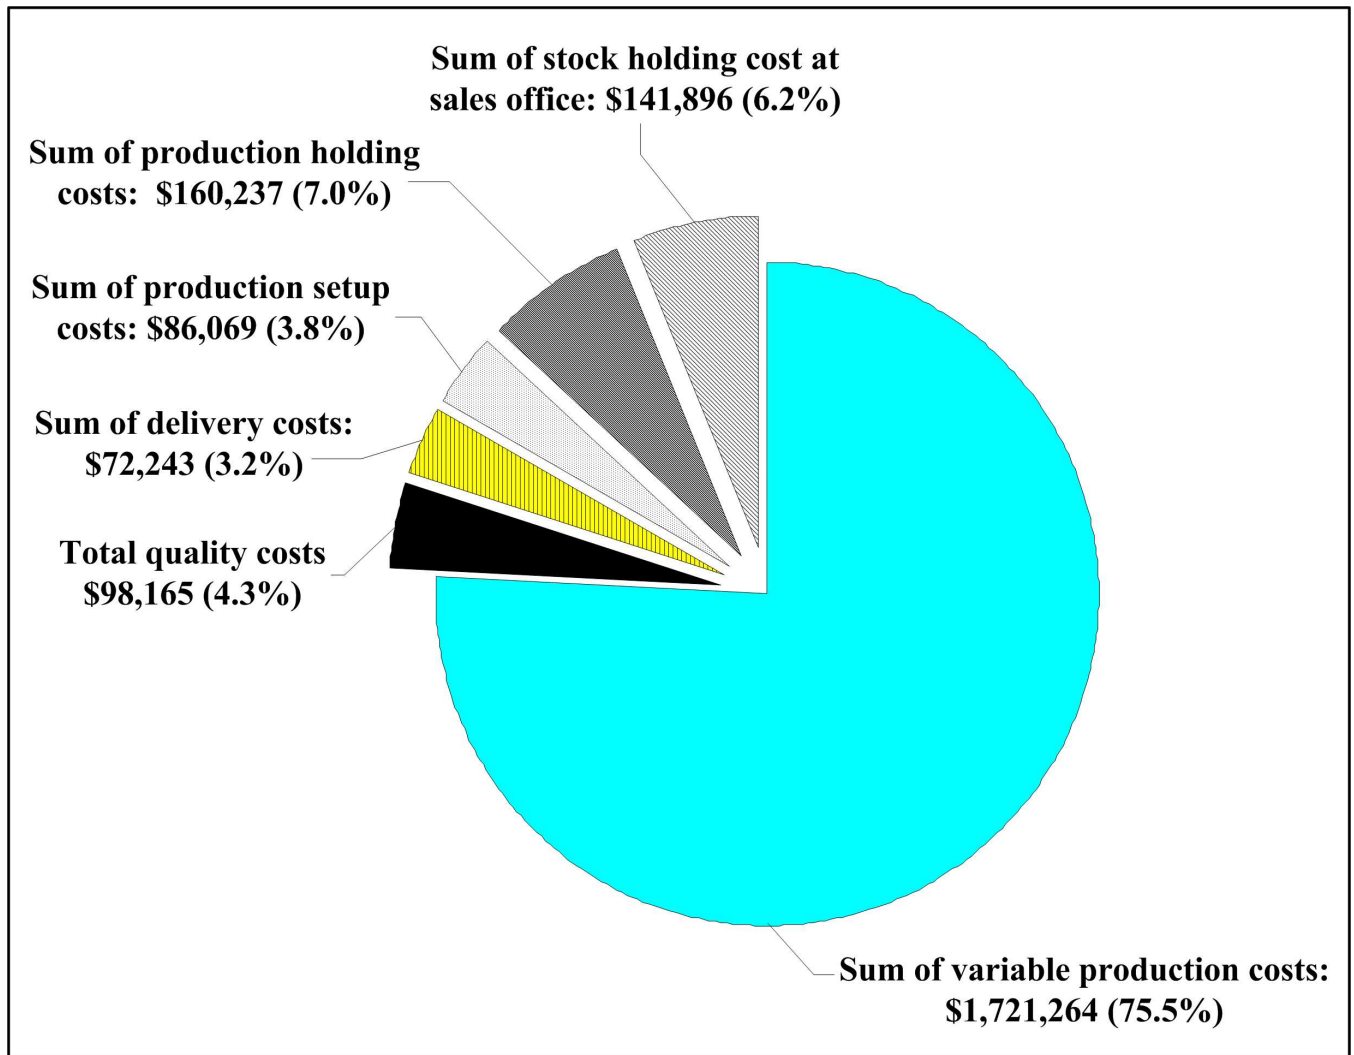

**Fig 8. Detailed analysis of components of the expected system cost  $E[TCU(T^*, n^*)]$ , which reveals the contributed percentages of each system related costs**

doi:10.1371/journal.pone.0167511.g008

- $t_{3i}$  = delivery time for product  $i$  in the proposed multi-product intra-supply chain system,
- $t_{ni}$  = fixed interval of time between each installment of finished product  $i$  transported in  $t_{3i}$ ,
- $T$  = common production cycle time—a decision variable,
- $H_{1i}$  = maximum on-hand inventory level of product  $i$  when uptime ends,
- $H_{2i}$  = maximum on-hand inventory level of product  $i$  when rework process ends,
- $d_{2i}$  = production rate of scrap items during rework for product  $i$ ,
- $n$  = number of fixed-quantity installments of the finished batch to be transported to sales office in each cycle—another decision variable,
- $I(t)_i$  = on-hand inventory level of perfect quality product  $i$  at time  $t$ ,
- $I_c(t)_i$  = on-hand inventory of product  $i$  stored at the sales offices' at time  $t$ ,

$D_i$  = fixed quantity of finished product  $i$  transported to the sales offices per delivery,

$I_i$  = left over product  $i$  per delivery after depletion during  $t_{ni}$ ,

$I_s(t)_i$  = on-hand inventory level of scrapped product  $i$  at time  $t$ ,

$TC(Q_i, n)$  = total production-inventory-delivery cost per cycle for product  $i$ ,

$E[TCU(Q_i, n)]$  = total expected production-inventory-delivery costs per unit time for producing  $L$  products in the proposed multi-product intra-supply chain system,

$E[TCU(T, n)]$  = total expected production-inventory-delivery costs per unit time for producing  $L$  products in the proposed system using rotation cycle time as the decision variable.

## Acknowledgments

Authors would like to express their gratefulness to Ministry of Science and Technology (MOST) of Taiwan for sponsoring this study under grant number: MOST 102-2410-H-324-015-MY2.

## Author Contributions

**Conceptualization:** SWC YSPC.

**Data curation:** SWCHEN CKC YSPC.

**Formal analysis:** SWC SWCHEN CKC YSPC.

**Funding acquisition:** YSPC.

**Investigation:** SWCHEN CKC.

**Methodology:** SWC YSPC.

**Project administration:** SWC YSPC.

**Resources:** YSPC.

**Software:** SWCHEN CKC YSPC.

**Supervision:** SWC YSPC.

**Validation:** SWC SWCHEN CKC.

**Visualization:** SWC YSPC.

**Writing – original draft:** SWC YSPC.

**Writing – review & editing:** SWC YSPC.

## References

1. Silver EA, Pyke DF, Peterson R. Inventory management and production planning and scheduling. New York: John Wiley & Sons; 1998.
2. Nahmias S. Production & Operations Analysis. New York: McGraw-Hill Inc.; 2009.
3. Zipkin PH. Models for design and control of stochastic, multi-item batch production systems. Operations Research. 1986; 34(1): 91–104.
4. Rosenblatt MJ, Rothblum UG. On the single resource capacity problem for multi-item inventory systems. Operations Research. 1990; 38(4): 686–693.

5. Arreola-Risa A. Integrated multi-item production-inventory systems. *European Journal of Operational Research*. 1996; 89(2): 326–340.
6. Khoury BN, Abboud NE, Tannous MM. The common cycle approach to the ELSP problem with insufficient capacity. *International Journal Production Economics*. 2001; 73(2): 189–199.
7. Caggiano KE, Jackson PL, Muckstadt JA, Rappold JA. Efficient computation of time-based customer service levels in a multi-item, multi-echelon supply chain: A practical approach for inventory optimization. *European Journal of Operational Research*. 2009; 199(3): 744–749.
8. Björk K-M. A multi-item fuzzy economic production quantity problem with a finite production rate. *International Journal Production Economics*. 2012; 135(2): 702–707.
9. Gaalman GJ. Optimal aggregation of multi-item production smoothing models. *Management Science*. 1978; 24(16): 1733–1739.
10. Dixon PS, Silver EA. A heuristic solution procedure for the multi-item, single-level, limited capacity, lot-sizing problem. *Journal of Operations Management*. 1981; 2(1): 23–39.
11. Ma W-N, Gong D-C, Lin GC. An optimal common production cycle time for imperfect production processes with scrap. *Mathematical and Computer Modelling*. 2010; 52(5–6): 724–737.
12. Chiu Y-SP, Lin C-AK, Chang H-H, Chiu V. Mathematical modeling for determining economic batch size and optimal number of deliveries for EPQ model with quality assurance. *Mathematical and Computer Modelling of Dynamical Systems*. 2010; 16(4): 373–388.
13. Guerrero WJ, Yeung TG, Guéret C. Joint-optimization of inventory policies on a multi-product multi-echelon pharmaceutical system with batching and ordering constraints. *European Journal of Operational Research*. 2013; 231(1): 98–108.
14. Chiu Y-SP, Sung P-C, Chiu SW, Chou C-L. Mathematical modeling of a multi-product EMQ model with an enhanced end items issuing policy and failures in rework. *SpringerPlus*. 2015; 4:679, doi: [10.1186/s40064-015-1487-4](https://doi.org/10.1186/s40064-015-1487-4) PMID: [26558182](https://pubmed.ncbi.nlm.nih.gov/26558182/)
15. Agnihotri SR, Kenett RS. Impact of defects on a process with rework. *European Journal of Operational Research*. 1995; 80(2): 308–327.
16. Teunter RH, Flapper SDP. Lot-sizing for a single-stage single-product production system with rework of perishable production defectives. *OR Spectrum*, 2003; 25(1): 85–96.
17. Sarker BR, Jamal AMM, Mondal S. Optimal batch sizing in a multi-stage production system with rework consideration. *European Journal of Operational Research*. 2008; 184(3): 915–929.
18. Wee HM, Widyadana GA. A production model for deteriorating items with stochastic preventive maintenance time and rework process with FIFO rule. *Omega*. 2013; 41(6): 941–954.
19. Lin GC, Gong D-C, Chang C-C. On an economic production quantity model with two unreliable key components subject to random failures. *Journal of Scientific & Industrial Research*. 2014; 73(3): 149–152.
20. Khedlekar UK, Shukla D, Chandel RPS. Computational study for disrupted production system with time dependent demand. *Journal of Scientific & Industrial Research*. 2014; 73: 294–301.
21. Chiu Y-SP, Wu M-F, Cheng F-T, Hwang M-H. Replenishment lot sizing with failure in rework and an enhanced multi-shipment policy. *Journal of Scientific & Industrial Research*. 2014; 73: 648–652.
22. Pal S, Mahapatra GS, Samanta GP. A production inventory model for deteriorating item with ramp type demand allowing inflation and shortages under fuzziness. *Economic Modelling*. 2015; 46: 334–345.
23. Ocampo LA. A hierarchical framework for index computation in sustainable manufacturing. *Advances in Production Engineering & Management*. 2015; 10: 40–50.
24. Taft EW. The most economical production lot. *Iron Age*. 1918; 101: 1410–1412.
25. Banerjee A. A joint economic-lot-size model for purchaser and vendor. *Decision Sciences*. 1986; 17(3): 292–311.
26. Thomas DJ, Hackman ST. A committed delivery strategy with fixed frequency and quantity. *European Journal of Operational Research*. 2003; 148(2): 363–373.
27. Archetti C, Doerner KF, Tricoire F. A heuristic algorithm for the free newspaper delivery problem. *European Journal of Operational Research*. 2013; 230(2): 245–257.
28. Chiu Y-SP, Pan N, Chiu SW, Chiang K-W. Optimal production cycle time for multi-item FPR model with rework and multi-shipment policy. *International Journal for Engineering Modelling*. 2012; 25(1–4): 51–57.
29. Chiu SW, Lee C-H, Chiu Y-SP, Cheng F-T. Intra-supply chain system with multiple sales locations and quality assurance. *Expert Systems with Applications*. 2013; 40(7): 2669–2676.
30. Goyal SK. Integrated inventory model for a single supplier—single customer problem. *International Journal of Production Research*. 1977; 15(1): 107–111.



31. Hahm J, Yano CA. The economic lot and delivery scheduling problem: The single item case. *International Journal of Production Economics*. 1992; 28: 235–252.
32. Chiu Y-SP, Chiu SW, Li C-Y, Ting C-K. Incorporating multi-delivery policy and quality assurance into economic production lot size problem. *Journal of Scientific & Industrial Research*. 2009; 68(6): 505–512.
33. Kuhn H, Liske T. Simultaneous supply and production planning. *International Journal of Production Research*. 2011; 49(13): 3795–3813.
34. Jang W, Kim D, Park K. Inventory allocation and shipping when demand temporarily exceeds production capacity. *European Journal of Operational Research*. 2013; 227(3): 464–470.
35. Safaei M. An integrated multi-objective model for allocating the limited sources in a multiple multi-stage lean supply chain. *Economic Modelling*. 2014; 37: 224–237.
36. Tseng C-T, Wu M-F, Lin H-D, Chiu Y-SP. Solving a vendor-buyer integrated problem with rework and a specific multi-delivery policy by a two-phase algebraic approach. *Economic Modelling*. 2014; 36: 30–36.
37. Wu M-F, Chiu Y-SP, Sung P-C. Optimization of a multi-product EPQ model with scrap and an improved multi-delivery policy. *Journal of Engineering Research*. 2014; 2: 51–65.
38. Pérez C, Geunes JA. (Q, R) inventory replenishment model with two delivery modes. *European Journal of Operational Research*. 2014; 237(2): 528–545.
39. Chiu SW, Huang C-C, Chiang K-W, Wu M-F. On intra-supply chain system with an improved distribution plan, multiple sales locations and quality assurance. SpringerPlus. 2015; 4:687, doi: [10.1186/s40064-015-1498-1](https://doi.org/10.1186/s40064-015-1498-1) PMID: [26576330](https://pubmed.ncbi.nlm.nih.gov/26576330/)
40. Hishamuddin H.; Sarker R.A.; Essam D. A recovery mechanism for a two echelon supply chain system under supply disruption. *Economic Modelling*. 2014; 38, 555–563.
41. Li L-h, Mo R. Production Task Queue Optimization Based on Multi-Attribute Evaluation for Complex Product Assembly Workshop. PLoS ONE. 2015; 10(9): e0134343. doi: [10.1371/journal.pone.0134343](https://doi.org/10.1371/journal.pone.0134343) PMID: [26414758](https://pubmed.ncbi.nlm.nih.gov/26414758/)
42. Masoumik SM, Abdul-Rashid SH, Olugu EU. The development of a strategic prioritization method for green supply chain initiatives. PLoS ONE. 2015; 10(11): e0143115. doi: [10.1371/journal.pone.0143115](https://doi.org/10.1371/journal.pone.0143115) PMID: [26618353](https://pubmed.ncbi.nlm.nih.gov/26618353/)
43. Kwok JJM, Lee D-Y. Coopetitive Supply Chain Relationship Model: Application to the Smartphone Manufacturing Network. PLoS ONE. 2015; 10(7): e0132844. doi: [10.1371/journal.pone.0132844](https://doi.org/10.1371/journal.pone.0132844) PMID: [26186227](https://pubmed.ncbi.nlm.nih.gov/26186227/)
44. Gómez J, Salazar I, Vargas P. Sources of Information as Determinants of Product and Process Innovation. PLoS ONE. 2016; 11(4): e0152743. doi: [10.1371/journal.pone.0152743](https://doi.org/10.1371/journal.pone.0152743) PMID: [27035456](https://pubmed.ncbi.nlm.nih.gov/27035456/)
45. Chiu SW, Sung P-C, Tseng C-T, Chiu Y-SP. Multi-product FPR model with rework and multi-shipment policy resolved by algebraic approach, *Journal of Scientific & Industrial Research*. 2015; 74(10): 555–559.
46. Haider A, Mirza J. An implementation of lean scheduling in a job shop environment. *Advances in Production Engineering & Management*. 2015; 10(1): 5–17
47. Meng X, Sun S, Li X, Wang L, Xia C, Sun J. Interdependency enriches the spatial reciprocity in prisoner's dilemma game on weighted network. *Physica A: Statistical Mechanics and its Applications*. 2016; 442: 388–396.
48. Xia C-Y, Meloni S, Perc M, Moreno Y. Dynamic instability of cooperation due to diverse activity patterns in evolutionary social dilemmas. *EPL (Europhysics Letters)*. 2015; 109 (5):58002.
49. Xia C-Y, Meng XK, Wang Z. Heterogeneous Coupling between interdependent lattices promotes the cooperation in the prisoner's dilemma game. PLoS ONE. 2015; 10(6): e0129542. doi: [10.1371/journal.pone.0129542](https://doi.org/10.1371/journal.pone.0129542) PMID: [26102082](https://pubmed.ncbi.nlm.nih.gov/26102082/)
50. Rardin R.L. *Optimization in Operations Research*. New Jersey: Prentice-Hall; 1998.
